# Supplementary material for: Effectiveness of non-pharmacological traditional Chinese medicine combined with conventional therapy in treating fibromyalgia: a systematic review and meta-analysis
Source: Front Neurosci. 2023 Jun 1;17:1097475. doi: 10.3389/fnins.2023.1097475 (PMC10267337; doi:10.3389/fnins.2023.1097475)
Supplement: Supplementary file 2 [file Table_2.DOCX]

**Title Page**

**Title**

Effectiveness of Non-pharmacological Traditional Chinese Medicine Combined with Conventional Therapy in Treating Fibromyalgia: A Systematic Review and Meta-Analysis

**Authors**

Lili Cai1,3† (First author), B.M.

Zhengquan Chen1† (Co-first author), M.S.

Juping Liang1† (Co-first author), M.S.

Yuanyuan Song2 (Co-author), B.S.

Hong Yu1 (Co-author), B.S.

Jiaye Zhu1 (Co-author), B.S.

Qikai Wu1 (Co-author), M.S.

Xuan Zhou1* (Co-corresponding author), M.M.

Qing Du1,2* (Corresponding author), Ph.D.

* Corresponding authors.

†. These authors contributed equally to this work.

1. Department of Rehabilitation, Xinhua Hospital, School of Medicine, Shanghai Jiaotong University, Shanghai, China

2. Chongming Hospital, Shanghai University of Medicine & Health Sciences, Shanghai, China

3. Xinhua Hospital, Shanghai Jiao Tong University School of Medicine, Shanghai, 200092, China

**Disclosure**

The authors have nothing to disclose.

**Corresponding author
*Name:*** Qing Du

***Address:*** Department of Rehabilitation, Xinhua Hospital, School of Medicine, Shanghai Jiaotong University, 1665 Kongjiang Road, Shanghai 200092, China

***Email:*** [duqing@xinhuamed.com.cn](mailto:duqing@xinhuamed.com.cn)

***Name:*** Xuan Zhou

***Address:*** Department of Rehabilitation, Xinhua Hospital, School of Medicine, Shanghai Jiaotong University, 1665 Kongjiang Road, Shanghai 200092, China

***Email:*** [zhouxuan@xinhuamed.com.cn](mailto:zhouxuan@xinhuamed.com.cn)

**Word count of the text:** 5627 (with references)

**Number of figures:** 7

**Number of tables:** 3

**PROSPERO registration number:** CRD42022352991 (Available at <http://www.crd.york.ac.uk/prospero/)>

**List of abbreviations**

| BARS | Body Awareness Rating Scale |
| --- | --- |
| BDI | Beck Depression Inventory |
| CBT | cognitive behavioral therapy |
| CI | confidence interval |
| CINAHL | Cumulative Index of Nursing and Allied Health Literature |
| Ex-HN-3 | Yintang |
| FIQ | Fibromyalgia Impact Questionnaire |
| GB34 | Yanglingquan |
| GRADE | Grading of Recommendations Assessment, Development, and Evaluation |
| HAM | Hamilton test score |
| LI4 | Hegu |
| LR3 | Taichong |
| PC6 | Neiguan |
| PPT | pressure pain threshold |
| PRISMA | Preferred Reporting Items for Systematic review and Meta-Analysis |
| RCT | Randomized Controlled Trial |
| SD | standard deviation |
| SF-12 | short form 12 questionnaire |
| SF-36 | short form 36 questionnaire |
| SMD | standardized mean difference |
| SNRI | serotonin-norepinephrine reuptake inhibitors |
| SP6 | Sanyinjiao |
| TCAs | tricyclic antidepressants |
| TCM | Traditional Chinese Medicine |
| TePsN | number of tender points |
| VAS | visual analogue scale |
| WMD | weighted mean difference |
